# Supplementary material for: The profile of sight-threatening diabetic retinopathy in patients attending a specialist eye clinic in Hangzhou, China
Source: PubMed Central journal article supplement — BMJ Open Ophthalmol. 2019 Apr 11;4(1):e000236. doi: 10.1136/bmjophth-2018-000236 (PMC6528772; doi:10.1136/bmjophth-2018-000236), 2019-04-11
Supplement: bmjophth-2018-000236supp002.pdf [file bmjophth-2018-000236supp002.pdf]

Supplementary Table 1. Summary of data for those who were not sure if current appointment was their first diabetic eye examination

| <b>Categorical Variable/Question</b>                                     | <b>Parameters</b> | <b>Category</b> | <b>No. of patients</b> | <b>% of overall</b> |
|--------------------------------------------------------------------------|-------------------|-----------------|------------------------|---------------------|
| Fundus examination:<br>Retinopathy Severity                              | Clinical          | STDR            | 28                     | 77.8                |
|                                                                          |                   | NSTDR           | 8                      | 22.2                |
| How long have you had diabetes for?                                      | Diabetic duration | >10 years       | 15                     | 41.7                |
|                                                                          |                   | ≤10 years       | 21                     | 58.3                |
| Can diabetes affect eyes?                                                | Knowledge         | Yes             | 22                     | 61.1                |
|                                                                          |                   | No/not sure     | 14                     | 38.9                |
| Does diabetes restrict your everyday activities?                         | Awareness         | Yes             | 22                     | 61.1                |
|                                                                          |                   | No/not sure     | 14                     | 38.9                |
| How often last year you had to go hospital for uncontrolled blood sugar? | Diabetic control  | ≥1-10 times     | 22                     | 61.1                |
|                                                                          |                   | 0 times         | 14                     | 38.9                |
